# Supplementary material
Source: PubMed Central journal article supplement (PMC5720373)
Supplement: NIHMS854187-supplement-Suppl.pdf [file NIHMS854187-supplement-Suppl.pdf]

## SUPPLEMENTARY MATERIAL

# TUNING HERG OUT: ANTITARGET QSAR MODELS FOR DRUG DEVELOPMENT

*Rodolpho C. Braga,<sup>1,2,†</sup> Vinícius M. Alves,<sup>1,†</sup> Meryck F. B. Silva,<sup>1</sup> Eugene Muratov,<sup>3</sup> Denis Fourches,<sup>3</sup> Alexander Tropsha,<sup>3</sup> and Carolina H. Andrade.<sup>1\*</sup>*

<sup>1</sup> Laboratory for Molecular Modeling and Drug Design, Faculty of Pharmacy, Federal University of Goiás, Rua 240, Qd. 87, Setor Leste Universitário, Goiânia, Goiás 74605-170, Brazil.

<sup>2</sup> Laboratory of Nuclear Magnetic Resonance, Chemistry Institute, Federal University of Goiás, P.O. Box 131, Goiânia, Goiás 74001-970, Brazil.

<sup>3</sup> Laboratory for Molecular Modeling, Division of Chemical Biology and Medicinal Chemistry, Eshelman School of Pharmacy, University of North Carolina, Chapel Hill, NC, 27599, USA.

\*Address correspondence to this author at LabMol, Faculdade de Farmácia, Universidade Federal de Goiás, Rua 240, Qd. 87, Setor Leste Universitário, Goiânia, Goiás 74605-170, Brazil. Tel: + 55 62 3209-6451; Fax: +55 62 3209 6037; E-mail: [carolina@ufg.br](mailto:carolina@ufg.br)

**Table S1.** Statistical characteristics of QSAR models for hERG liability for the threshold of 1  $\mu$ M assessed by 5-fold for the modeling set.

| Model name         | Modeling Set (threshold 1 $\mu$ M; $n=3951$ ) |      |       |      |                         |             |           |      |      |          | Model parameters                                          |
|--------------------|-----------------------------------------------|------|-------|------|-------------------------|-------------|-----------|------|------|----------|-----------------------------------------------------------|
|                    | Accuracy                                      | BAC  | Kappa | MCC  | Sensitivity<br>(Recall) | Specificity | Precision | F1   | AUC  | Coverage |                                                           |
| MACCS-SVM          | 0.84                                          | 0.68 | 0.42  | 0.45 | 0.40                    | 0.96        | 0.73      | 0.51 | 0.68 | 0.71     | C=4                                                       |
| featMorgan-SVM     | 0.86                                          | 0.72 | 0.50  | 0.52 | 0.48                    | 0.96        | 0.74      | 0.58 | 0.72 | 0.74     | C=4                                                       |
| Pharm. FP-SVM      | 0.84                                          | 0.61 | 0.30  | 0.35 | 0.25                    | 0.97        | 0.70      | 0.37 | 0.61 | 0.78     | C=4                                                       |
| PubChem-SVM        | 0.85                                          | 0.69 | 0.45  | 0.47 | 0.43                    | 0.95        | 0.70      | 0.53 | 0.69 | 0.71     | C=4                                                       |
| MACCS-RF           | 0.84                                          | 0.72 | 0.48  | 0.49 | 0.51                    | 0.93        | 0.68      | 0.58 | 0.72 | 0.71     | mtry=125                                                  |
| featMorgan-RF      | 0.85                                          | 0.71 | 0.48  | 0.49 | 0.48                    | 0.94        | 0.68      | 0.56 | 0.71 | 0.74     | mtry=215                                                  |
| Pharm. FP-RF       | 0.86                                          | 0.69 | 0.45  | 0.47 | 0.43                    | 0.95        | 0.69      | 0.53 | 0.69 | 0.78     | mtry=106                                                  |
| PubChem-RF         | 0.84                                          | 0.71 | 0.46  | 0.47 | 0.49                    | 0.93        | 0.65      | 0.56 | 0.71 | 0.71     | mtry=895                                                  |
| MACCS-TreeBag      | 0.84                                          | 0.71 | 0.47  | 0.48 | 0.49                    | 0.93        | 0.68      | 0.57 | 0.71 | 0.71     | none                                                      |
| featMorgan-TreeBag | 0.85                                          | 0.70 | 0.46  | 0.48 | 0.45                    | 0.95        | 0.70      | 0.54 | 0.70 | 0.74     | none                                                      |
| Pharm. FP-TreeBag  | 0.85                                          | 0.70 | 0.45  | 0.46 | 0.45                    | 0.95        | 0.65      | 0.53 | 0.70 | 0.78     | none                                                      |
| PubChem-TreeBag    | 0.84                                          | 0.71 | 0.46  | 0.46 | 0.50                    | 0.93        | 0.63      | 0.55 | 0.71 | 0.71     | none                                                      |
| MACCS-GBM          | 0.83                                          | 0.67 | 0.40  | 0.43 | 0.38                    | 0.95        | 0.70      | 0.50 | 0.67 | 0.71     | interaction depth = 5, ntrees=250, shrinkage=0.1          |
| featMorgan-GBM     | 0.85                                          | 0.69 | 0.45  | 0.47 | 0.43                    | 0.95        | 0.71      | 0.54 | 0.69 | 0.74     | interaction depth = 5, ntrees=250, shrinkage=0.1          |
| Pharm. FP-GBM      | 0.86                                          | 0.69 | 0.45  | 0.47 | 0.42                    | 0.96        | 0.70      | 0.53 | 0.69 | 0.78     | interaction depth = 5, ntrees=250, shrinkage=0.1          |
| PubChem-GBM        | 0.85                                          | 0.68 | 0.42  | 0.45 | 0.39                    | 0.96        | 0.71      | 0.51 | 0.68 | 0.71     | interaction depth = 4, ntrees=250, shrinkage=0.1          |
| Consensus          | 0.89                                          | 0.86 | 0.43  | 0.49 | 0.82                    | 0.90        | 0.34      | 0.48 | 0.86 | 0.83     | featMorgan-GBM +PubChem-TreeBag + Pharm. FP-RF +MACCS-SVM |
| Consensus Rigor    | 0.91                                          | 0.88 | 0.53  | 0.56 | 0.83                    | 0.92        | 0.43      | 0.57 | 0.88 | 0.40     | featMorgan-GBM +PubChem-TreeBag + Pharm. FP-RF +MACCS-SVM |

SVM: Support Vector Machine; RF: Random Forest; TreeBag: Tree Bagging method; GBM: Gradient boosting method; MACCS: MACCS keys; PubChem: PubChem Fingerprints; Pharm.FP: ChemAxon

Pharmacophore Fingerprint; FeatMorgan: Circular fingerprint based on the Morgan algorithm and feature invariants (FCFP-like); BAC: Balanced Accuracy; MCC: Matthews correlation coefficient; AUC: the area under receiver operating characteristic curve; Consensus and Consensus Rigor were built by averaging the predicted values from each individual model (featMorgan-GBM, PubChem-TreeBag, Pharm. FP-RF, MACCS-SVM).

**Table S2.** Statistical characteristics of QSAR models for hERG liability for the threshold of 1  $\mu$ M assessed by test set.

| Model name         | Test Set (threshold 1 $\mu$ M, $n=987$ ) |      |       |      |                         |             |           |      |      |          |
|--------------------|------------------------------------------|------|-------|------|-------------------------|-------------|-----------|------|------|----------|
|                    | Accuracy                                 | BAC  | Kappa | MCC  | Sensitivity<br>(Recall) | Specificity | Precision | F1   | AUC  | Coverage |
| MACCS-SVM          | 0.86                                     | 0.71 | 0.50  | 0.53 | 0.44                    | 0.98        | 0.84      | 0.57 | 0.71 | 0.86     |
| featMorgan-SVM     | 0.86                                     | 0.72 | 0.52  | 0.57 | 0.45                    | 0.98        | 0.88      | 0.59 | 0.72 | 0.82     |
| Pharm. FP-SVM      | 0.83                                     | 0.59 | 0.26  | 0.34 | 0.20                    | 0.99        | 0.78      | 0.32 | 0.59 | 0.88     |
| PubChem-SVM        | 0.86                                     | 0.68 | 0.45  | 0.49 | 0.39                    | 0.98        | 0.81      | 0.52 | 0.68 | 0.75     |
| MACCS-RF           | 0.85                                     | 0.72 | 0.51  | 0.52 | 0.50                    | 0.95        | 0.74      | 0.60 | 0.72 | 0.86     |
| featMorgan-RF      | 0.86                                     | 0.73 | 0.53  | 0.55 | 0.51                    | 0.96        | 0.78      | 0.62 | 0.73 | 0.82     |
| Pharm. FP-RF       | 0.88                                     | 0.73 | 0.54  | 0.56 | 0.50                    | 0.97        | 0.78      | 0.61 | 0.73 | 0.88     |
| PubChem-RF         | 0.86                                     | 0.73 | 0.51  | 0.52 | 0.50                    | 0.95        | 0.72      | 0.59 | 0.73 | 0.75     |
| MACCS-TreeBag      | 0.84                                     | 0.72 | 0.50  | 0.51 | 0.51                    | 0.94        | 0.70      | 0.59 | 0.72 | 0.86     |
| featMorgan-TreeBag | 0.85                                     | 0.71 | 0.50  | 0.52 | 0.47                    | 0.96        | 0.77      | 0.58 | 0.71 | 0.82     |
| Pharm. FP-TreeBag  | 0.87                                     | 0.74 | 0.54  | 0.55 | 0.53                    | 0.96        | 0.74      | 0.62 | 0.74 | 0.88     |
| PubChem-TreeBag    | 0.85                                     | 0.72 | 0.48  | 0.50 | 0.49                    | 0.95        | 0.69      | 0.57 | 0.72 | 0.75     |
| MACCS-GBM          | 0.84                                     | 0.69 | 0.46  | 0.49 | 0.41                    | 0.97        | 0.78      | 0.54 | 0.69 | 0.86     |
| featMorgan-GBM     | 0.85                                     | 0.69 | 0.48  | 0.53 | 0.41                    | 0.98        | 0.87      | 0.55 | 0.69 | 0.82     |
| Pharm. FP-GBM      | 0.86                                     | 0.69 | 0.47  | 0.50 | 0.41                    | 0.97        | 0.79      | 0.54 | 0.69 | 0.88     |
| PubChem-GBM        | 0.85                                     | 0.66 | 0.40  | 0.45 | 0.34                    | 0.98        | 0.79      | 0.48 | 0.66 | 0.75     |
| Consensus          | 0.90                                     | 0.90 | 0.54  | 0.59 | 0.89                    | 0.90        | 0.44      | 0.59 | 0.90 | 0.85     |
| Consensus Rigor    | 0.91                                     | 0.91 | 0.53  | 0.58 | 0.91                    | 0.91        | 0.42      | 0.58 | 0.91 | 0.53     |

SVM: Support Vector Machine; RF: Random Forest; TreeBag: Tree Bagging method; GBM: Gradient boosting method; MACCS: MACCS keys; PubChem: PubChem Fingerprints; Pharm.FP: ChemAxon Pharmacophore Fingerprint; FeatMorgan: Circular fingerprint based on the Morgan algorithm and feature invariants (FCFP-like); BAC: Balanced Accuracy; MCC: Matthews correlation coefficient; AUC: the area under receiver operating characteristic curve; Consensus and Consensus Rigor were built by averaging the predicted values from each individual model (featMorgan-GBM, PubChem-TreeBag, Pharm. FP-RF, MACCS-SVM).

**Table S3.** Statistical results of QSAR models for hERG liability for the threshold of 1 $\mu$ M assessed by y-randomization.

| <b>Model name</b>  | <b>Accuracy</b> | <b>BAC</b>      | <b>Kappa</b>    | <b>Sensitivity</b> | <b>Specificity</b> | <b>AUC</b>      |
|--------------------|-----------------|-----------------|-----------------|--------------------|--------------------|-----------------|
| MACCS-SVM          | 0.80 $\pm$ 0.01 | 0.50 $\pm$ 0.01 | 0.00 $\pm$ 0.01 | 0.00 $\pm$ 0.01    | 1.00 $\pm$ 0.01    | 0.50 $\pm$ 0.01 |
| featMorgan-SVM     | 0.80 $\pm$ 0.01 | 0.50 $\pm$ 0.01 | 0.00 $\pm$ 0.01 | 0.00 $\pm$ 0.01    | 1.00 $\pm$ 0.01    | 0.50 $\pm$ 0.02 |
| Pharm. FP-SVM      | 0.80 $\pm$ 0.01 | 0.50 $\pm$ 0.01 | 0.00 $\pm$ 0.01 | 0.00 $\pm$ 0.01    | 1.00 $\pm$ 0.01    | 0.51 $\pm$ 0.02 |
| PubChem-SVM        | 0.80 $\pm$ 0.01 | 0.50 $\pm$ 0.01 | 0.00 $\pm$ 0.01 | 0.00 $\pm$ 0.01    | 1.00 $\pm$ 0.01    | 0.50 $\pm$ 0.03 |
| MACCS-RF           | 0.80 $\pm$ 0.01 | 0.50 $\pm$ 0.01 | 0.00 $\pm$ 0.01 | 0.00 $\pm$ 0.01    | 1.00 $\pm$ 0.01    | 0.52 $\pm$ 0.02 |
| featMorgan-RF      | 0.76 $\pm$ 0.01 | 0.51 $\pm$ 0.01 | 0.00 $\pm$ 0.01 | 0.00 $\pm$ 0.01    | 0.00 $\pm$ 0.01    | 0.53 $\pm$ 0.02 |
| Pharm. FP-RF       | 0.80 $\pm$ 0.01 | 0.50 $\pm$ 0.01 | 0.00 $\pm$ 0.01 | 0.00 $\pm$ 0.01    | 1.00 $\pm$ 0.01    | 0.51 $\pm$ 0.01 |
| PubChem-RF         | 0.80 $\pm$ 0.01 | 0.50 $\pm$ 0.01 | 0.00 $\pm$ 0.01 | 0.00 $\pm$ 0.01    | 1.00 $\pm$ 0.01    | 0.50 $\pm$ 0.02 |
| MACCS-TreeBag      | 0.75 $\pm$ 0.01 | 0.50 $\pm$ 0.03 | 0.01 $\pm$ 0.05 | 0.09 $\pm$ 0.05    | 0.91 $\pm$ 0.01    | 0.51 $\pm$ 0.03 |
| featMorgan-TreeBag | 0.78 $\pm$ 0.01 | 0.50 $\pm$ 0.01 | 0.00 $\pm$ 0.03 | 0.03 $\pm$ 0.02    | 0.97 $\pm$ 0.01    | 0.51 $\pm$ 0.04 |
| Pharm. FP-TreeBag  | 0.75 $\pm$ 0.01 | 0.50 $\pm$ 0.01 | 0.01 $\pm$ 0.03 | 0.07 $\pm$ 0.02    | 0.92 $\pm$ 0.01    | 0.51 $\pm$ 0.03 |
| PubChem-TreeBag    | 0.74 $\pm$ 0.01 | 0.50 $\pm$ 0.02 | 0.01 $\pm$ 0.03 | 0.11 $\pm$ 0.03    | 0.90 $\pm$ 0.01    | 0.51 $\pm$ 0.02 |
| MACCS-GBM          | 0.80 $\pm$ 0.01 | 0.30 $\pm$ 0.01 | 0.00 $\pm$ 0.01 | 0.00 $\pm$ 0.01    | 1.00 $\pm$ 0.01    | 0.50 $\pm$ 0.01 |
| featMorgan-GBM     | 0.80 $\pm$ 0.01 | 0.31 $\pm$ 0.01 | 0.00 $\pm$ 0.01 | 0.01 $\pm$ 0.01    | 1.00 $\pm$ 0.01    | 0.51 $\pm$ 0.01 |
| Pharm. FP-GBM      | 0.79 $\pm$ 0.01 | 0.31 $\pm$ 0.01 | 0.00 $\pm$ 0.01 | 0.01 $\pm$ 0.01    | 0.99 $\pm$ 0.01    | 0.52 $\pm$ 0.03 |
| PubChem-GBM        | 0.80 $\pm$ 0.01 | 0.31 $\pm$ 0.01 | 0.00 $\pm$ 0.01 | 0.00 $\pm$ 0.01    | 1.00 $\pm$ 0.01    | 0.51 $\pm$ 0.01 |

The presented results are based on an average overall 10 randomly shuffled response (y-randomization); SVM: Support Vector Machine; RF: Random Forest; TreeBag: Tree Bagging method; GBM: Gradient boosting method; MACCS: MACCS keys; PubChem: PubChem Fingerprints; Pharm.FP: ChemAxon Pharmacophore Fingerprint; FeatMorgan: Circular fingerprint based on the Morgan algorithm and feature invariants (FCFP-like); BAC: Balanced Accuracy; MCC: Matthews correlation coefficient; AUC: the area under receiver operating characteristic curve.

**Table S4.** Statistical characteristics of QSAR models for hERG liability for the threshold of 10 $\mu$ M assessed by 5-fold for the modeling set.

| Model name         | Modeling Set (threshold 10 $\mu$ M; $n=3867$ ) |      |       |      |                         |             |           |      |      |          | Model parameters                                        |
|--------------------|------------------------------------------------|------|-------|------|-------------------------|-------------|-----------|------|------|----------|---------------------------------------------------------|
|                    | Accuracy                                       | BAC  | Kappa | MCC  | Sensitivity<br>(Recall) | Specificity | Precision | F1   | AUC  | Coverage |                                                         |
| MACCS-SVM          | 0.78                                           | 0.75 | 0.51  | 0.52 | 0.86                    | 0.64        | 0.80      | 0.83 | 0.75 | 0.70     | C=4                                                     |
| featMorgan-SVM     | 0.80                                           | 0.78 | 0.57  | 0.57 | 0.86                    | 0.69        | 0.81      | 0.84 | 0.78 | 0.74     | C=4                                                     |
| Pharm. FP-SVM      | 0.76                                           | 0.74 | 0.49  | 0.50 | 0.85                    | 0.63        | 0.77      | 0.81 | 0.74 | 0.78     | C=4                                                     |
| PubChem-SVM        | 0.79                                           | 0.77 | 0.54  | 0.54 | 0.85                    | 0.68        | 0.81      | 0.83 | 0.77 | 0.70     | C=4                                                     |
| MACCS-RF           | 0.78                                           | 0.75 | 0.52  | 0.52 | 0.85                    | 0.66        | 0.81      | 0.83 | 0.75 | 0.70     | mtry=43                                                 |
| featMorgan-RF      | 0.79                                           | 0.77 | 0.55  | 0.55 | 0.86                    | 0.68        | 0.81      | 0.83 | 0.77 | 0.74     | mtry=45                                                 |
| Pharm. FP-RF       | 0.78                                           | 0.77 | 0.55  | 0.55 | 0.84                    | 0.71        | 0.78      | 0.81 | 0.77 | 0.78     | mtry=25                                                 |
| PubChem-RF         | 0.79                                           | 0.77 | 0.54  | 0.55 | 0.85                    | 0.69        | 0.81      | 0.83 | 0.77 | 0.70     | mtry=194                                                |
| MACCS-TreeBag      | 0.78                                           | 0.76 | 0.53  | 0.53 | 0.85                    | 0.67        | 0.81      | 0.83 | 0.76 | 0.70     | none                                                    |
| featMorgan-TreeBag | 0.77                                           | 0.76 | 0.52  | 0.52 | 0.84                    | 0.67        | 0.80      | 0.82 | 0.76 | 0.74     | none                                                    |
| Pharm. FP-TreeBag  | 0.76                                           | 0.74 | 0.50  | 0.50 | 0.83                    | 0.66        | 0.78      | 0.80 | 0.74 | 0.78     | none                                                    |
| PubChem-TreeBag    | 0.78                                           | 0.76 | 0.53  | 0.53 | 0.84                    | 0.69        | 0.81      | 0.82 | 0.76 | 0.70     | none                                                    |
| MACCS-GBM          | 0.77                                           | 0.74 | 0.49  | 0.49 | 0.85                    | 0.62        | 0.79      | 0.82 | 0.74 | 0.70     | interaction depth = 5, ntrees=250, shrinkage=0.1        |
| featMorgan-GBM     | 0.76                                           | 0.74 | 0.50  | 0.50 | 0.84                    | 0.64        | 0.79      | 0.81 | 0.74 | 0.74     | interaction depth = 5, ntrees=250, shrinkage=0.1        |
| Pharm. FP-GBM      | 0.77                                           | 0.75 | 0.51  | 0.51 | 0.84                    | 0.65        | 0.78      | 0.81 | 0.75 | 0.78     | interaction depth = 5, ntrees=250, shrinkage=0.1        |
| PubChem-GBM        | 0.78                                           | 0.76 | 0.52  | 0.52 | 0.85                    | 0.66        | 0.80      | 0.82 | 0.76 | 0.70     | interaction depth = 5, ntrees=250, shrinkage=0.1        |
| Consensus          | 0.84                                           | 0.83 | 0.65  | 0.65 | 0.85                    | 0.81        | 0.90      | 0.88 | 0.83 | 0.74     | featMorgan-GBM +PubChem-TreeBag+Pharm. FP-RF +MACCS-SVM |
| Consensus Rigor    | 0.88                                           | 0.87 | 0.71  | 0.71 | 0.89                    | 0.84        | 0.93      | 0.91 | 0.87 | 0.34     | featMorgan-GBM +PubChem-TreeBag+Pharm. FP-RF +MACCS-SVM |

SVM: Support Vector Machine; RF: Random Forest; TreeBag: Tree Bagging method; GBM: Gradient boosting method; MACCS: MACCS keys; PubChem: PubChem Fingerprints; Pharm.FP: ChemAxon

Pharmacophore Fingerprint; FeatMorgan: Circular fingerprint based on the Morgan algorithm and feature invariants (FCFP-like); BAC: Balanced Accuracy; MCC: Matthews correlation coefficient; AUC: the area under receiver operating characteristic curve; Consensus and Consensus Rigor were built by averaging the predicted values from each individual model (featMorgan-GBM, PubChem-TreeBag, Pharm. FP-RF, MACCS-SVM).

**Table S5.** Statistical results of QSAR models for hERG liability for the threshold of 10 $\mu$ M assessed by y-randomization.

| <b>Model name</b>  | <b>Accuracy</b> | <b>BAC</b>      | <b>Kappa</b>    | <b>Sensitivity</b> | <b>Specificity</b> | <b>AUC</b>      |
|--------------------|-----------------|-----------------|-----------------|--------------------|--------------------|-----------------|
| MACCS-SVM          | 0.59 $\pm$ 0.01 | 0.50 $\pm$ 0.01 | 0.00 $\pm$ 0.01 | 1.00 $\pm$ 0.01    | 0.00 $\pm$ 0.01    | 0.52 $\pm$ 0.02 |
| featMorgan-SVM     | 0.59 $\pm$ 0.01 | 0.50 $\pm$ 0.01 | 0.00 $\pm$ 0.01 | 1.00 $\pm$ 0.01    | 0.00 $\pm$ 0.01    | 0.51 $\pm$ 0.02 |
| Pharm. FP-SVM      | 0.59 $\pm$ 0.01 | 0.50 $\pm$ 0.01 | 0.00 $\pm$ 0.01 | 1.00 $\pm$ 0.01    | 0.00 $\pm$ 0.01    | 0.52 $\pm$ 0.01 |
| PubChem-SVM        | 0.59 $\pm$ 0.01 | 0.50 $\pm$ 0.01 | 0.00 $\pm$ 0.01 | 1.00 $\pm$ 0.01    | 0.00 $\pm$ 0.01    | 0.52 $\pm$ 0.02 |
| MACCS-RF           | 0.59 $\pm$ 0.01 | 0.50 $\pm$ 0.01 | 0.00 $\pm$ 0.01 | 1.00 $\pm$ 0.01    | 0.00 $\pm$ 0.01    | 0.52 $\pm$ 0.01 |
| featMorgan-RF      | 0.59 $\pm$ 0.01 | 0.50 $\pm$ 0.01 | 0.00 $\pm$ 0.01 | 1.00 $\pm$ 0.01    | 0.00 $\pm$ 0.01    | 0.53 $\pm$ 0.01 |
| Pharm. FP-RF       | 0.54 $\pm$ 0.01 | 0.51 $\pm$ 0.02 | 0.01 $\pm$ 0.03 | 0.70 $\pm$ 0.02    | 0.31 $\pm$ 0.02    | 0.52 $\pm$ 0.01 |
| PubChem-RF         | 0.54 $\pm$ 0.01 | 0.50 $\pm$ 0.01 | 0.00 $\pm$ 0.02 | 0.68 $\pm$ 0.03    | 0.32 $\pm$ 0.02    | 0.52 $\pm$ 0.01 |
| MACCS-TreeBag      | 0.52 $\pm$ 0.01 | 0.49 $\pm$ 0.01 | 0.02 $\pm$ 0.01 | 0.64 $\pm$ 0.01    | 0.34 $\pm$ 0.01    | 0.51 $\pm$ 0.01 |
| featMorgan-TreeBag | 0.57 $\pm$ 0.01 | 0.50 $\pm$ 0.02 | 0.00 $\pm$ 0.01 | 0.88 $\pm$ 0.01    | 0.12 $\pm$ 0.02    | 0.50 $\pm$ 0.01 |
| Pharm. FP-TreeBag  | 0.54 $\pm$ 0.01 | 0.50 $\pm$ 0.02 | 0.01 $\pm$ 0.02 | 0.68 $\pm$ 0.02    | 0.33 $\pm$ 0.04    | 0.50 $\pm$ 0.01 |
| PubChem-TreeBag    | 0.53 $\pm$ 0.03 | 0.50 $\pm$ 0.03 | 0.00 $\pm$ 0.05 | 0.66 $\pm$ 0.01    | 0.34 $\pm$ 0.04    | 0.51 $\pm$ 0.01 |
| MACCS-GBM          | 0.59 $\pm$ 0.01 | 0.31 $\pm$ 0.01 | 0.02 $\pm$ 0.01 | 0.93 $\pm$ 0.02    | 0.08 $\pm$ 0.02    | 0.51 $\pm$ 0.01 |
| featMorgan-GBM     | 0.59 $\pm$ 0.01 | 0.31 $\pm$ 0.01 | 0.02 $\pm$ 0.02 | 0.94 $\pm$ 0.01    | 0.08 $\pm$ 0.01    | 0.51 $\pm$ 0.01 |
| Pharm. FP-GBM      | 0.59 $\pm$ 0.01 | 0.31 $\pm$ 0.02 | 0.02 $\pm$ 0.03 | 0.96 $\pm$ 0.01    | 0.09 $\pm$ 0.01    | 0.52 $\pm$ 0.01 |
| PubChem-GBM        | 0.59 $\pm$ 0.01 | 0.31 $\pm$ 0.01 | 0.01 $\pm$ 0.01 | 0.84 $\pm$ 0.01    | 0.05 $\pm$ 0.02    | 0.52 $\pm$ 0.02 |

The presented results are based on an average overall 10 randomly shuffled response (y-randomization); SVM: Support Vector Machine; RF: Random Forest; TreeBag: Tree Bagging method; GBM: Gradient boosting method; MACCS: MACCS keys; PubChem: PubChem Fingerprints; Pharm.FP: ChemAxon Pharmacophore Fingerprint; FeatMorgan: Circular fingerprint based on the Morgan algorithm and feature invariants (FCFP-like); BAC: Balanced Accuracy; MCC: Matthews correlation coefficient; AUC: the area under receiver operating characteristic curve.

**Table S6.** Statistical characteristics of QSAR models for hERG liability for the threshold of 10 $\mu$ M assessed by test set.

| Model name         | Test Set (threshold 10 $\mu$ M, $n=966$ ) |      |       |      |                         |             |           |      |      |          |
|--------------------|-------------------------------------------|------|-------|------|-------------------------|-------------|-----------|------|------|----------|
|                    | Accuracy                                  | BAC  | Kappa | MCC  | Sensitivity<br>(Recall) | Specificity | Precision | F1   | AUC  | Coverage |
| MACCS-SVM          | 0.83                                      | 0.79 | 0.60  | 0.60 | 0.91                    | 0.66        | 0.84      | 0.87 | 0.79 | 0.85     |
| featMorgan-SVM     | 0.85                                      | 0.82 | 0.65  | 0.66 | 0.92                    | 0.72        | 0.87      | 0.89 | 0.82 | 0.80     |
| Pharm. FP-SVM      | 0.82                                      | 0.78 | 0.58  | 0.59 | 0.91                    | 0.64        | 0.83      | 0.87 | 0.78 | 0.87     |
| PubChem-SVM        | 0.82                                      | 0.79 | 0.60  | 0.60 | 0.89                    | 0.68        | 0.84      | 0.87 | 0.79 | 0.71     |
| MACCS-RF           | 0.84                                      | 0.80 | 0.62  | 0.63 | 0.91                    | 0.70        | 0.85      | 0.88 | 0.80 | 0.85     |
| featMorgan-RF      | 0.85                                      | 0.82 | 0.66  | 0.66 | 0.93                    | 0.71        | 0.86      | 0.89 | 0.82 | 0.80     |
| Pharm. FP-RF       | 0.84                                      | 0.81 | 0.64  | 0.64 | 0.90                    | 0.72        | 0.86      | 0.88 | 0.81 | 0.87     |
| PubChem-RF         | 0.84                                      | 0.82 | 0.65  | 0.65 | 0.89                    | 0.76        | 0.88      | 0.88 | 0.82 | 0.71     |
| MACCS-TreeBag      | 0.83                                      | 0.80 | 0.62  | 0.62 | 0.89                    | 0.72        | 0.86      | 0.88 | 0.80 | 0.85     |
| featMorgan-TreeBag | 0.83                                      | 0.79 | 0.61  | 0.61 | 0.91                    | 0.68        | 0.85      | 0.88 | 0.79 | 0.80     |
| Pharm. FP-TreeBag  | 0.84                                      | 0.81 | 0.64  | 0.65 | 0.91                    | 0.71        | 0.86      | 0.88 | 0.81 | 0.87     |
| PubChem-TreeBag    | 0.83                                      | 0.80 | 0.61  | 0.61 | 0.88                    | 0.73        | 0.86      | 0.87 | 0.80 | 0.71     |
| MACCS-GBM          | 0.81                                      | 0.77 | 0.56  | 0.57 | 0.90                    | 0.64        | 0.83      | 0.86 | 0.77 | 0.85     |
| featMorgan-GBM     | 0.83                                      | 0.80 | 0.61  | 0.61 | 0.90                    | 0.69        | 0.85      | 0.88 | 0.80 | 0.80     |
| Pharm. FP-GBM      | 0.81                                      | 0.77 | 0.56  | 0.56 | 0.90                    | 0.64        | 0.83      | 0.86 | 0.77 | 0.87     |
| PubChem-GBM        | 0.82                                      | 0.78 | 0.58  | 0.58 | 0.89                    | 0.67        | 0.84      | 0.86 | 0.78 | 0.71     |
| Consensus          | 0.90                                      | 0.91 | 0.75  | 0.76 | 0.89                    | 0.93        | 0.97      | 0.93 | 0.91 | 0.78     |
| Consensus Rigor    | 0.93                                      | 0.93 | 0.81  | 0.81 | 0.93                    | 0.93        | 0.98      | 0.95 | 0.93 | 0.46     |

SVM: Support Vector Machine; RF: Random Forest; TreeBag: Tree Bagging method; GBM: Gradient boosting method; MACCS: MACCS keys; PubChem: PubChem Fingerprints; Pharm.FP: ChemAxon Pharmacophore Fingerprint; FeatMorgan: Circular fingerprint based on the Morgan algorithm and feature invariants (FCFP-like); BAC: Balanced Accuracy; MCC: Matthews correlation coefficient; AUC: the area under receiver operating characteristic curve; Consensus and Consensus Rigor were built by averaging the predicted values from each individual model (featMorgan-GBM, PubChem-TreeBag, Pharm. FP-RF, MACCS-SVM).

**Table S7.** Statistical characteristics of QSAR models for hERG liability for the threshold of 20 $\mu$ M assessed by 5-fold for the modeling set.

| Model name         | Modeling Set (threshold 20 $\mu$ M; $n=3636$ ) |      |       |      |                         |             |           |      |      |          | Model parameters                                        |
|--------------------|------------------------------------------------|------|-------|------|-------------------------|-------------|-----------|------|------|----------|---------------------------------------------------------|
|                    | Accuracy                                       | BAC  | Kappa | MCC  | Sensitivity<br>(Recall) | Specificity | Precision | F1   | AUC  | Coverage |                                                         |
| MACCS-SVM          | 0.85                                           | 0.74 | 0.53  | 0.55 | 0.95                    | 0.53        | 0.86      | 0.90 | 0.74 | 0.70     | C=4                                                     |
| featMorgan-SVM     | 0.85                                           | 0.75 | 0.56  | 0.57 | 0.95                    | 0.56        | 0.86      | 0.90 | 0.75 | 0.73     | C=4                                                     |
| Pharm. FP-SVM      | 0.81                                           | 0.69 | 0.43  | 0.46 | 0.95                    | 0.43        | 0.82      | 0.88 | 0.69 | 0.77     | C=4                                                     |
| PubChem-SVM        | 0.83                                           | 0.73 | 0.51  | 0.52 | 0.94                    | 0.52        | 0.85      | 0.89 | 0.73 | 0.70     | C=4                                                     |
| MACCS-RF           | 0.83                                           | 0.74 | 0.51  | 0.52 | 0.91                    | 0.58        | 0.87      | 0.89 | 0.74 | 0.70     | mtry=125                                                |
| featMorgan-RF      | 0.84                                           | 0.74 | 0.52  | 0.53 | 0.94                    | 0.54        | 0.86      | 0.89 | 0.74 | 0.73     | mtry=45                                                 |
| Pharm. FP-RF       | 0.82                                           | 0.72 | 0.49  | 0.50 | 0.93                    | 0.52        | 0.84      | 0.88 | 0.72 | 0.77     | mtry=158                                                |
| PubChem-RF         | 0.83                                           | 0.75 | 0.52  | 0.53 | 0.92                    | 0.58        | 0.87      | 0.89 | 0.75 | 0.70     | mtry=895                                                |
| MACCS-TreeBag      | 0.82                                           | 0.73 | 0.49  | 0.49 | 0.90                    | 0.56        | 0.86      | 0.88 | 0.73 | 0.70     | none                                                    |
| featMorgan-TreeBag | 0.82                                           | 0.72 | 0.49  | 0.50 | 0.92                    | 0.52        | 0.85      | 0.89 | 0.72 | 0.73     | none                                                    |
| Pharm. FP-TreeBag  | 0.81                                           | 0.72 | 0.48  | 0.49 | 0.92                    | 0.52        | 0.84      | 0.88 | 0.72 | 0.77     | none                                                    |
| PubChem-TreeBag    | 0.83                                           | 0.75 | 0.52  | 0.52 | 0.91                    | 0.58        | 0.87      | 0.89 | 0.75 | 0.70     | none                                                    |
| MACCS-GBM          | 0.83                                           | 0.71 | 0.49  | 0.51 | 0.95                    | 0.48        | 0.85      | 0.90 | 0.71 | 0.70     | interaction depth = 4, ntrees=250, shrinkage=0.1        |
| featMorgan-GBM     | 0.84                                           | 0.73 | 0.51  | 0.53 | 0.95                    | 0.50        | 0.85      | 0.90 | 0.73 | 0.73     | interaction depth = 5, ntrees=250, shrinkage=0.1        |
| Pharm. FP-GBM      | 0.82                                           | 0.71 | 0.48  | 0.50 | 0.94                    | 0.49        | 0.84      | 0.88 | 0.71 | 0.77     | interaction depth = 5, ntrees=200, shrinkage=0.1        |
| PubChem-GBM        | 0.84                                           | 0.73 | 0.51  | 0.52 | 0.94                    | 0.52        | 0.85      | 0.90 | 0.73 | 0.70     | interaction depth = 5, ntrees=250, shrinkage=0.1        |
| Consensus          | 0.87                                           | 0.85 | 0.55  | 0.57 | 0.87                    | 0.82        | 0.97      | 0.92 | 0.85 | 0.84     | featMorgan-GBM +PubChem-TreeBag+Pharm. FP-RF +MACCS-SVM |
| Consensus Rigor    | 0.90                                           | 0.90 | 0.61  | 0.64 | 0.91                    | 0.88        | 0.99      | 0.94 | 0.90 | 0.38     | featMorgan-GBM +PubChem-TreeBag+Pharm. FP-RF +MACCS-SVM |

SVM: Support Vector Machine; RF: Random Forest; TreeBag: Tree Bagging method; GBM: Gradient boosting method; MACCS: MACCS keys; PubChem: PubChem Fingerprints; Pharm.FP: ChemAxon

Pharmacophore Fingerprint; FeatMorgan: Circular fingerprint based on the Morgan algorithm and feature invariants (FCFP-like); BAC: Balanced Accuracy; MCC: Matthews correlation coefficient; AUC: the area under receiver operating characteristic curve; Consensus and Consensus Rigor were built by averaging the predicted values from each individual model (featMorgan-GBM, PubChem-TreeBag, Pharm. FP-RF, MACCS-SVM).



**Table S8.** Statistical characteristics of QSAR models for hERG liability for the threshold of 20 $\mu$ M assessed by test set.

| Test Set (threshold 20 $\mu$ M, $n=908$ ) |          |      |       |      |                         |             |           |      |      |          |
|-------------------------------------------|----------|------|-------|------|-------------------------|-------------|-----------|------|------|----------|
| Model name                                | Accuracy | BAC  | Kappa | MCC  | Sensitivity<br>(Recall) | Specificity | Precision | F1   | AUC  | Coverage |
| MACCS-SVM                                 | 0.87     | 0.74 | 0.55  | 0.57 | 0.97                    | 0.52        | 0.88      | 0.92 | 0.74 | 0.86     |
| <b>featMorgan-SVM</b>                     | 0.90     | 0.79 | 0.64  | 0.66 | 0.97                    | 0.60        | 0.91      | 0.94 | 0.79 | 0.81     |
| Pharm. FP-SVM                             | 0.86     | 0.70 | 0.48  | 0.52 | 0.97                    | 0.43        | 0.87      | 0.92 | 0.70 | 0.89     |
| PubChem-SVM                               | 0.90     | 0.79 | 0.64  | 0.65 | 0.97                    | 0.61        | 0.91      | 0.94 | 0.79 | 0.72     |
| MACCS-RF                                  | 0.88     | 0.79 | 0.61  | 0.61 | 0.93                    | 0.65        | 0.91      | 0.92 | 0.79 | 0.86     |
| featMorgan-RF                             | 0.89     | 0.77 | 0.62  | 0.63 | 0.97                    | 0.58        | 0.90      | 0.93 | 0.77 | 0.81     |
| Pharm. FP-RF                              | 0.86     | 0.76 | 0.55  | 0.55 | 0.93                    | 0.59        | 0.90      | 0.91 | 0.76 | 0.89     |
| <b>PubChem-RF</b>                         | 0.87     | 0.77 | 0.56  | 0.56 | 0.93                    | 0.62        | 0.91      | 0.92 | 0.77 | 0.72     |
| MACCS-TreeBag                             | 0.86     | 0.77 | 0.56  | 0.56 | 0.93                    | 0.61        | 0.90      | 0.91 | 0.77 | 0.86     |
| featMorgan-TreeBag                        | 0.87     | 0.74 | 0.55  | 0.56 | 0.96                    | 0.53        | 0.89      | 0.92 | 0.74 | 0.81     |
| <b>Pharm. FP-TreeBag</b>                  | 0.86     | 0.77 | 0.56  | 0.56 | 0.93                    | 0.61        | 0.90      | 0.91 | 0.77 | 0.89     |
| PubChem-TreeBag                           | 0.86     | 0.75 | 0.52  | 0.53 | 0.93                    | 0.57        | 0.90      | 0.91 | 0.75 | 0.72     |
| <b>MACCS-GBM</b>                          | 0.86     | 0.71 | 0.48  | 0.51 | 0.96                    | 0.45        | 0.87      | 0.91 | 0.71 | 0.86     |
| featMorgan-GBM                            | 0.87     | 0.74 | 0.55  | 0.56 | 0.96                    | 0.53        | 0.89      | 0.92 | 0.74 | 0.81     |
| Pharm. FP-GBM                             | 0.87     | 0.73 | 0.53  | 0.55 | 0.96                    | 0.49        | 0.88      | 0.92 | 0.73 | 0.89     |
| PubChem-GBM                               | 0.88     | 0.77 | 0.59  | 0.60 | 0.96                    | 0.58        | 0.90      | 0.93 | 0.77 | 0.72     |
| <b>Consensus</b>                          | 0.92     | 0.89 | 0.64  | 0.66 | 0.92                    | 0.85        | 0.98      | 0.95 | 0.89 | 0.84     |
| Consensus Rigor                           | 0.94     | 0.94 | 0.66  | 0.69 | 0.94                    | 0.94        | 0.99      | 0.96 | 0.94 | 0.50     |

SVM: Support Vector Machine; RF: Random Forest; TreeBag: Tree Bagging method; GBM: Gradient boosting method; MACCS: MACCS keys; PubChem: PubChem Fingerprints; Pharm.FP: ChemAxon Pharmacophore Fingerprint; FeatMorgan: Circular fingerprint based on the Morgan algorithm and feature invariants (FCFP-like); BAC: Balanced Accuracy; MCC: Matthews correlation coefficient; AUC: the area under receiver operating characteristic curve; Consensus and Consensus Rigor were built by averaging the predicted values from each individual model (featMorgan-GBM, PubChem-TreeBag, Pharm. FP-RF, MACCS-SVM).

**Table S9.** Statistical results of QSAR models for hERG liability for the threshold of 20 $\mu$ M assessed by y-randomization.

| Model name         | Accuracy        | BAC             | Kappa           | Sensitivity     | Specificity     | AUC             |
|--------------------|-----------------|-----------------|-----------------|-----------------|-----------------|-----------------|
| MACCS-SVM          | 0.74 $\pm$ 0.01 | 0.50 $\pm$ 0.01 | 0.00 $\pm$ 0.01 | 1.00 $\pm$ 0.01 | 0.00 $\pm$ 0.01 | 0.52 $\pm$ 0.01 |
| featMorgan-SVM     | 0.74 $\pm$ 0.01 | 0.50 $\pm$ 0.01 | 0.00 $\pm$ 0.01 | 1.00 $\pm$ 0.01 | 0.00 $\pm$ 0.01 | 0.52 $\pm$ 0.02 |
| Pharm. FP-SVM      | 0.74 $\pm$ 0.01 | 0.50 $\pm$ 0.01 | 0.00 $\pm$ 0.01 | 1.00 $\pm$ 0.01 | 0.00 $\pm$ 0.01 | 0.52 $\pm$ 0.01 |
| PubChem-SVM        | 0.74 $\pm$ 0.01 | 0.50 $\pm$ 0.01 | 0.00 $\pm$ 0.01 | 1.00 $\pm$ 0.01 | 0.00 $\pm$ 0.01 | 0.52 $\pm$ 0.02 |
| MACCS-RF           | 0.74 $\pm$ 0.01 | 0.50 $\pm$ 0.01 | 0.00 $\pm$ 0.01 | 1.00 $\pm$ 0.01 | 0.00 $\pm$ 0.01 | 0.51 $\pm$ 0.01 |
| featMorgan-RF      | 0.74 $\pm$ 0.01 | 0.50 $\pm$ 0.01 | 0.00 $\pm$ 0.01 | 1.00 $\pm$ 0.01 | 0.00 $\pm$ 0.01 | 0.51 $\pm$ 0.02 |
| Pharm. FP-RF       | 0.68 $\pm$ 0.01 | 0.50 $\pm$ 0.01 | 0.00 $\pm$ 0.03 | 0.88 $\pm$ 0.02 | 0.12 $\pm$ 0.01 | 0.51 $\pm$ 0.01 |
| PubChem-RF         | 0.74 $\pm$ 0.01 | 0.50 $\pm$ 0.01 | 0.00 $\pm$ 0.01 | 1.00 $\pm$ 0.01 | 0.00 $\pm$ 0.01 | 0.52 $\pm$ 0.02 |
| MACCS-TreeBag      | 0.67 $\pm$ 0.02 | 0.50 $\pm$ 0.02 | 0.01 $\pm$ 0.04 | 0.86 $\pm$ 0.02 | 0.15 $\pm$ 0.03 | 0.51 $\pm$ 0.03 |
| featMorgan-TreeBag | 0.71 $\pm$ 0.01 | 0.50 $\pm$ 0.02 | 0.00 $\pm$ 0.02 | 0.94 $\pm$ 0.01 | 0.06 $\pm$ 0.01 | 0.51 $\pm$ 0.02 |
| Pharm. FP-TreeBag  | 0.67 $\pm$ 0.01 | 0.50 $\pm$ 0.02 | 0.00 $\pm$ 0.04 | 0.87 $\pm$ 0.01 | 0.13 $\pm$ 0.03 | 0.49 $\pm$ 0.01 |
| PubChem-TreeBag    | 0.68 $\pm$ 0.01 | 0.51 $\pm$ 0.02 | 0.03 $\pm$ 0.03 | 0.86 $\pm$ 0.02 | 0.16 $\pm$ 0.02 | 0.49 $\pm$ 0.02 |
| MACCS-GBM          | 0.73 $\pm$ 0.01 | 0.30 $\pm$ 0.01 | 0.00 $\pm$ 0.01 | 1.00 $\pm$ 0.01 | 0.00 $\pm$ 0.01 | 0.50 $\pm$ 0.01 |
| featMorgan-GBM     | 0.73 $\pm$ 0.01 | 0.31 $\pm$ 0.01 | 0.02 $\pm$ 0.02 | 0.99 $\pm$ 0.01 | 0.02 $\pm$ 0.01 | 0.52 $\pm$ 0.02 |
| Pharm. FP-GBM      | 0.73 $\pm$ 0.01 | 0.30 $\pm$ 0.01 | 0.01 $\pm$ 0.02 | 0.99 $\pm$ 0.01 | 0.02 $\pm$ 0.01 | 0.50 $\pm$ 0.01 |
| PubChem-GBM        | 0.73 $\pm$ 0.01 | 0.31 $\pm$ 0.01 | 0.01 $\pm$ 0.02 | 0.99 $\pm$ 0.01 | 0.02 $\pm$ 0.01 | 0.51 $\pm$ 0.02 |

The presented results are based on an average overall 10 randomly shuffled response (y-randomization); SVM: Support Vector Machine; RF: Random Forest; TreeBag: Tree Bagging method; GBM: Gradient boosting method; MACCS: MACCS keys; PubChem: PubChem Fingerprints; Pharm.FP: ChemAxon Pharmacophore Fingerprint; FeatMorgan: Circular fingerprint based on the Morgan algorithm and feature invariants (FCFP-like); BAC: Balanced Accuracy; MCC: Matthews correlation coefficient; AUC: the area under receiver operating characteristic curve.
